# Supplementary material
Source: Springer Nature journal article supplement (https://www.springermedizin.de/resource/supplementary/12943_2010_729_MOESM7_ESM.pdf/9554674)

UVC

ROS

ERK activation

MiTF

p21

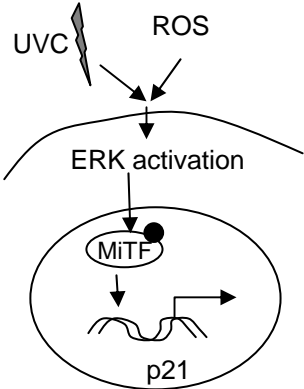

Supplement: MOESM7 [file 9554674]
